# Supplementary material for: Implications of Targeted Genomic Disruption of β-Catenin in BxPC-3 Pancreatic Adenocarcinoma Cells
Source: PLOS journal article supplement (doi:10.1371/journal.pone.0115496), 2014-12-23
Supplement: S1 (10.1371/journal.pone.0115496.s001) [file journal.pone.0115496.s001]

Supplementary Figure S1

A

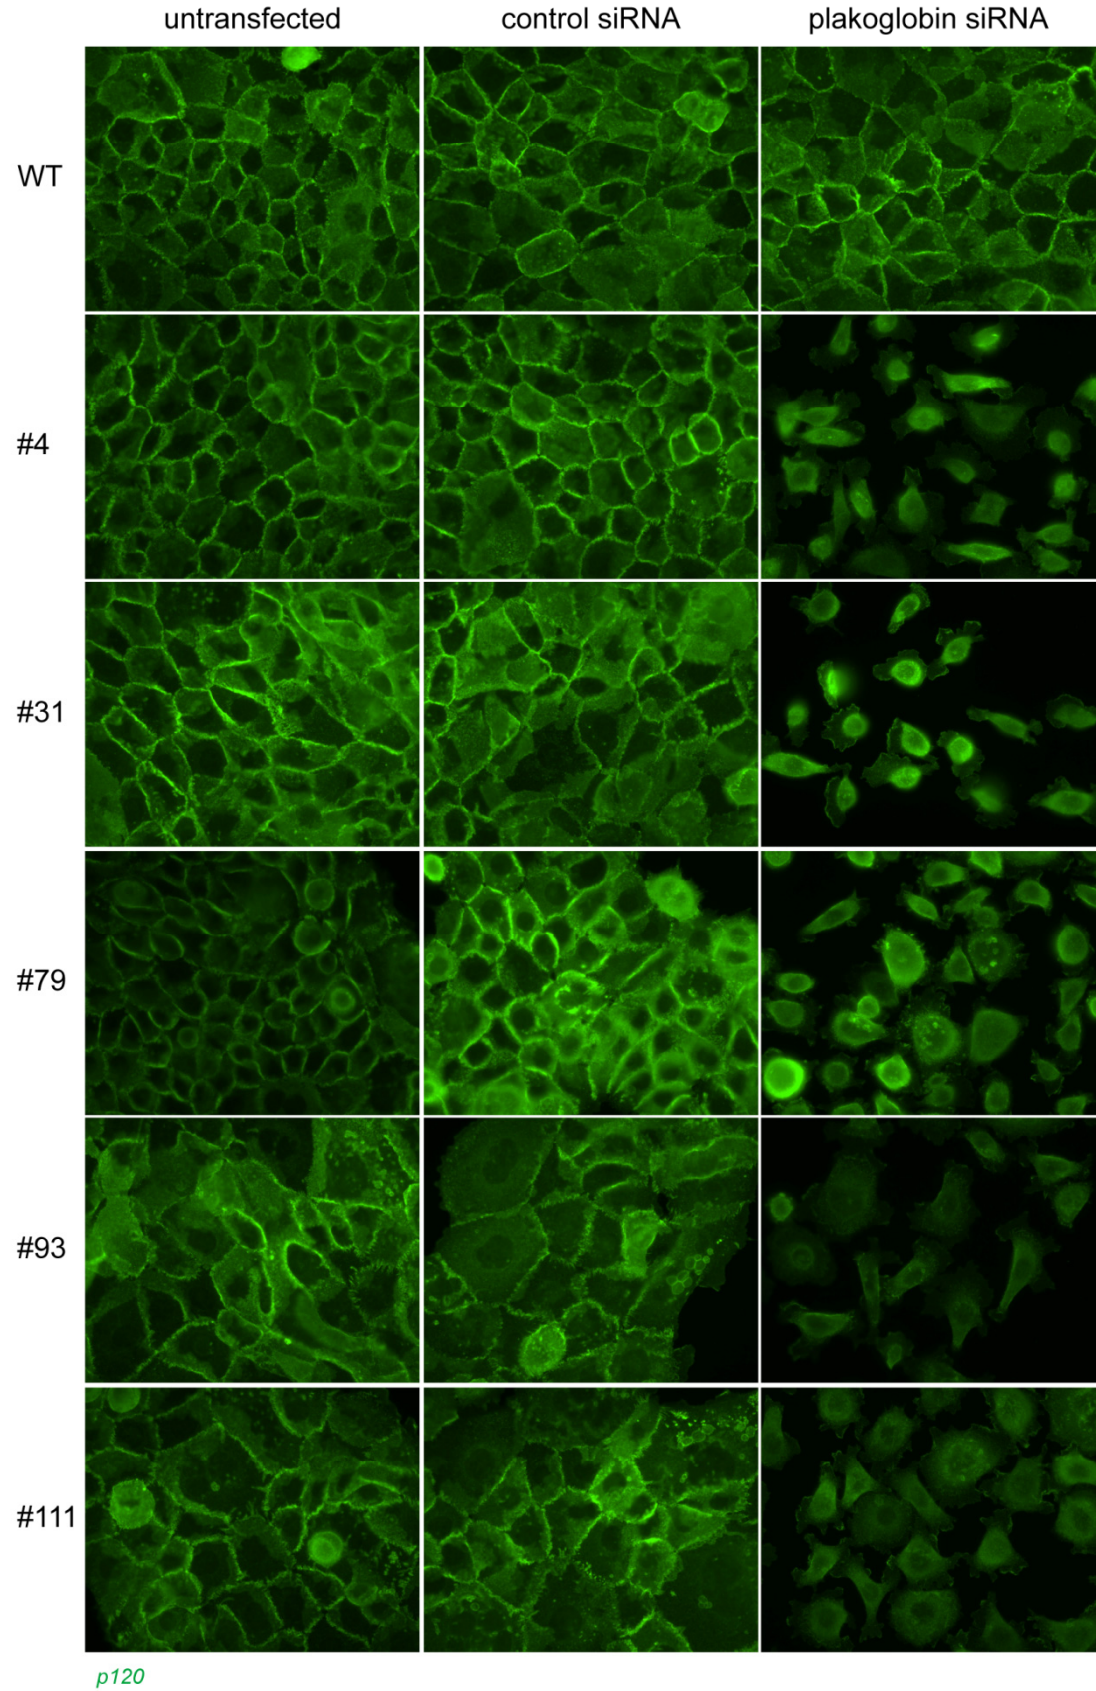

*p120*

Supplementary Figure S1

B

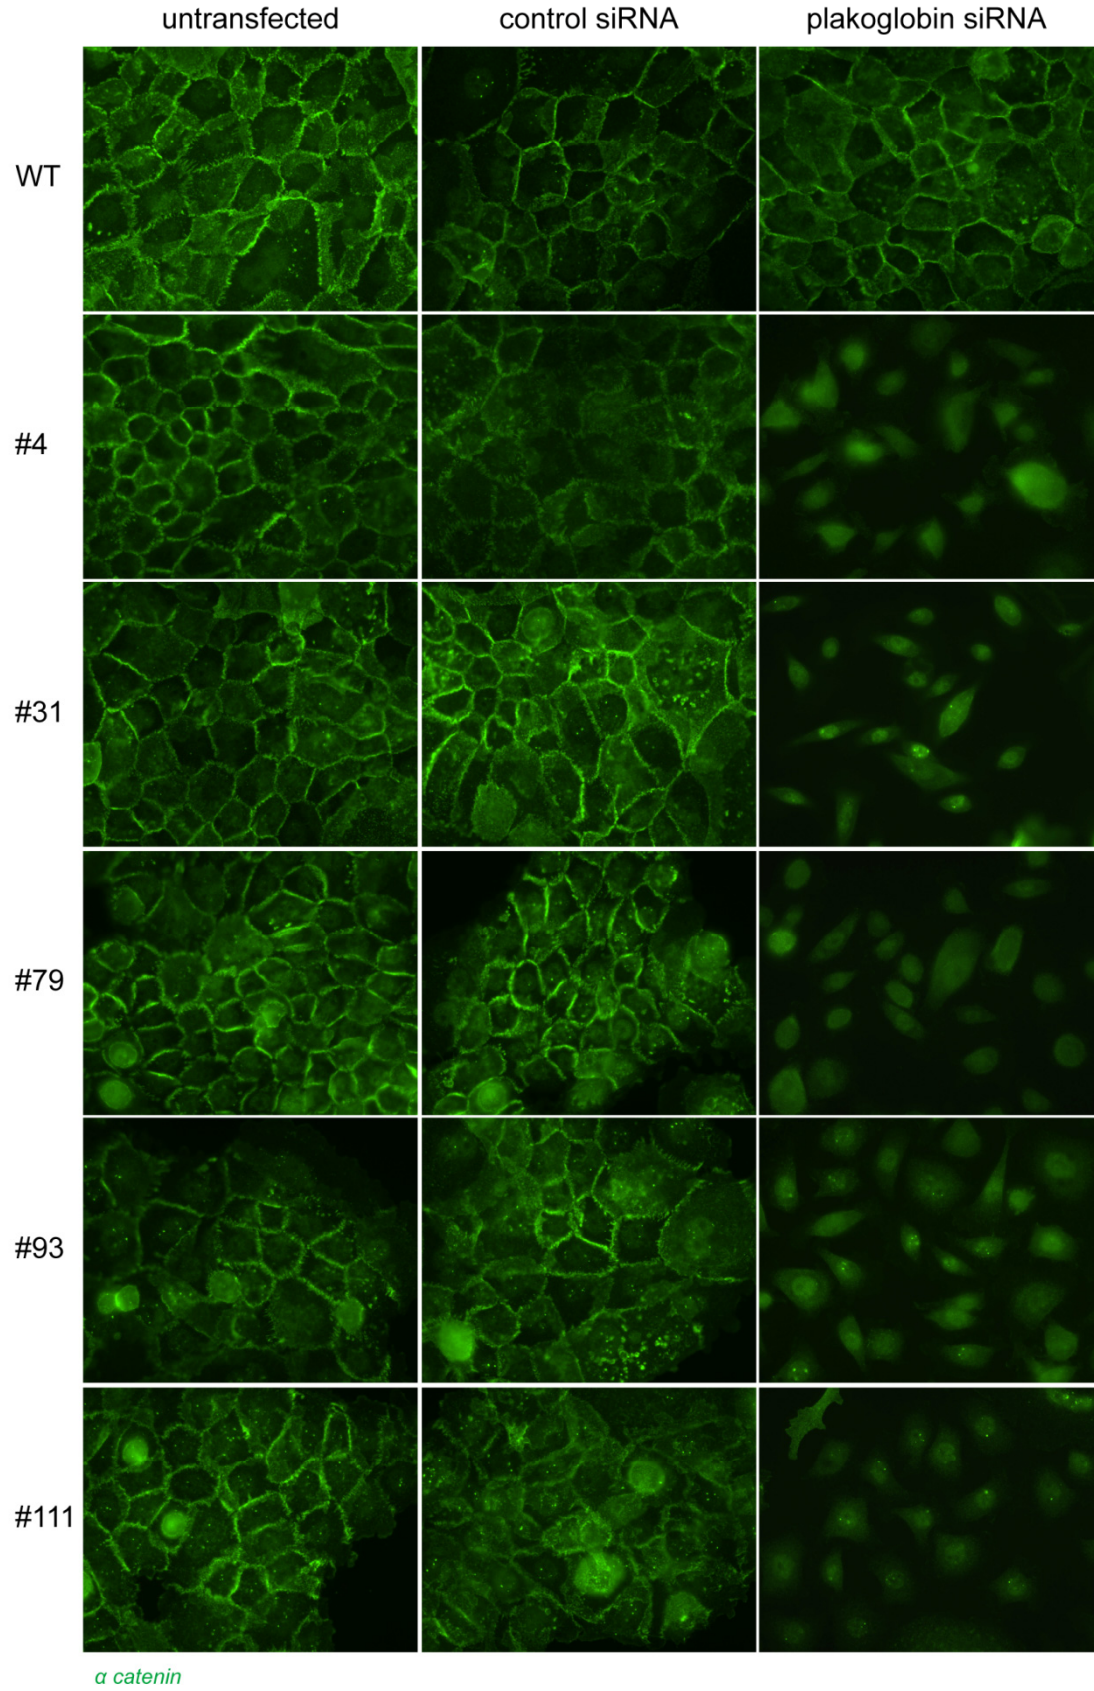

*α catenin*



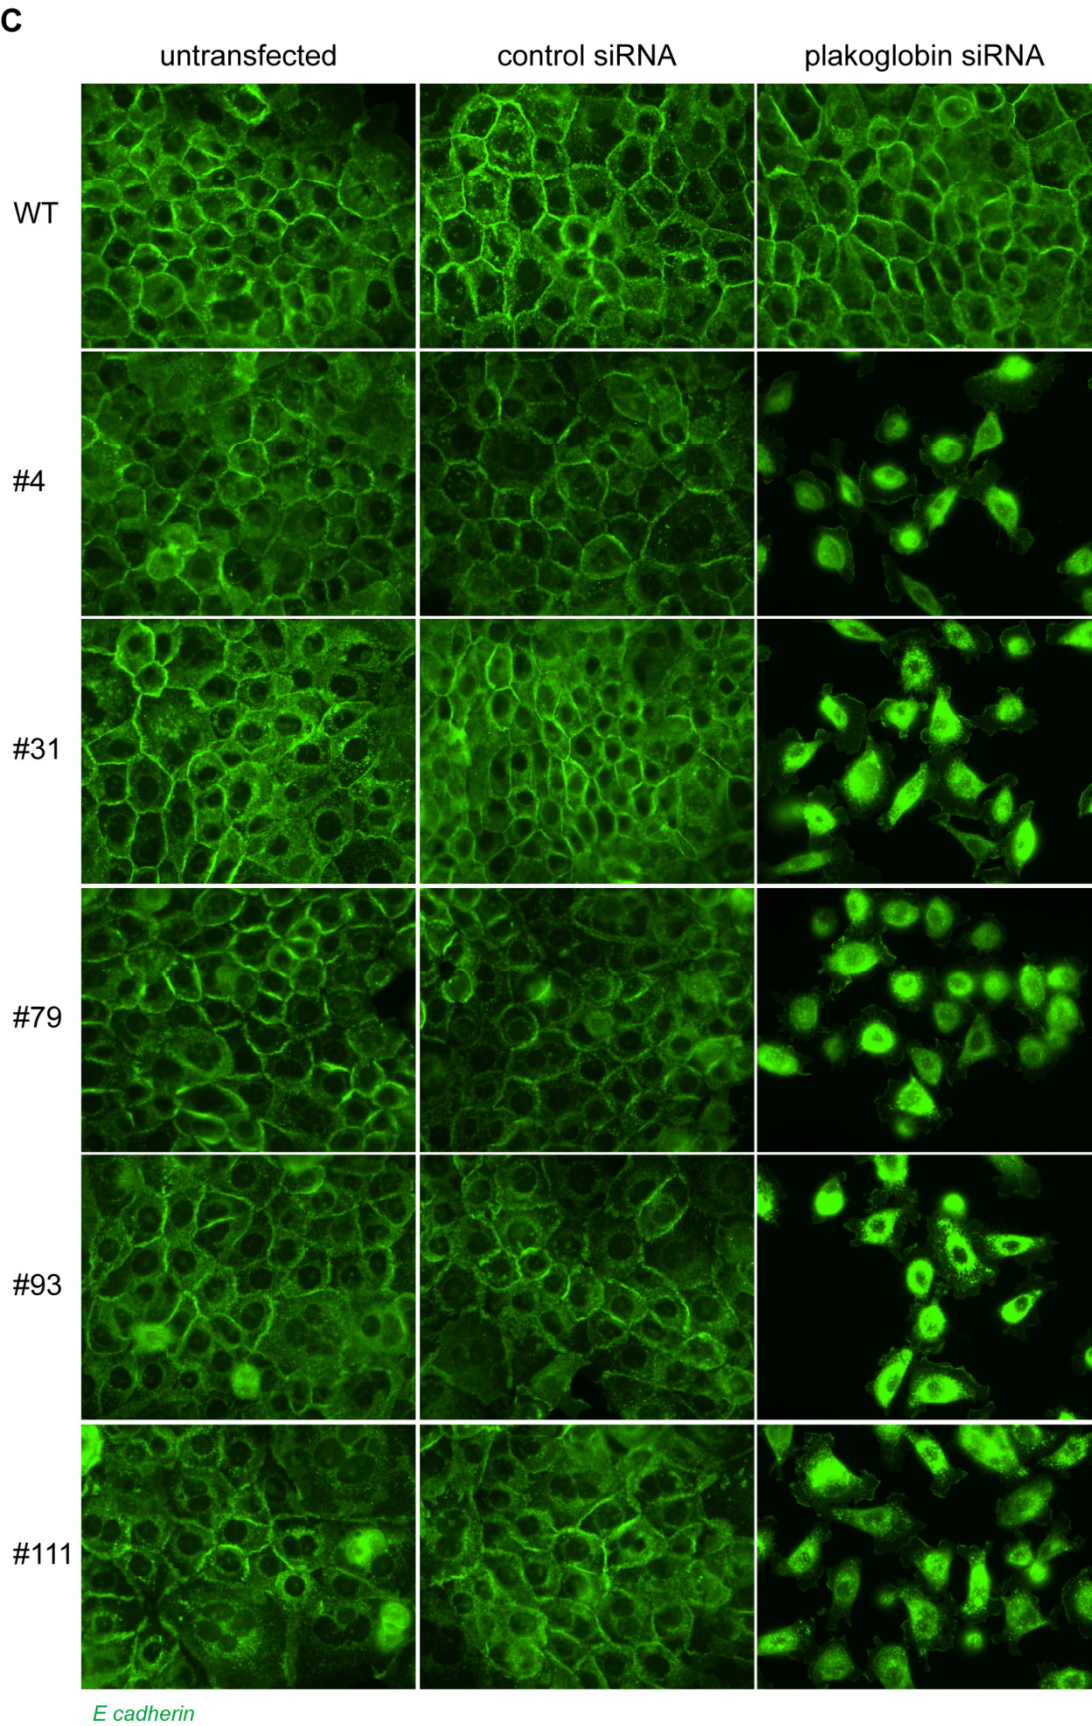

**Supplementary Figure S1. Immunostaining of plakoglobin siRNA treated WT and *CTNNB1* gene disrupted clones.** A) Immunostaining of untransfected, control and plakoglobin siRNA transfected WT and gene disrupted clones as indicated. The cells were stained with anti p120-catenin Ab 72 hours after siRNA transfection. B) Immunostaining as in A with anti  $\alpha$ -catenin Ab. C) Immunostaining as in A with anti E-cadherin Ab.
